# Supplementary material for: Investigation of the bipolar effect in the thermoelectric material CaMg2Bi2 using a first-principles study
Source: Royal Society of Chemistry journal article supplement (doi:10.1039/c6cp02057g), 2016-01-01
Supplement: c6cp02057g1.pdf [file c6cp02057g1.pdf]

## SUPPLEMENTARY INFORMATION

### Bipolar effect in thermoelectric material $\text{CaMg}_2\text{Bi}_2$ by a first-principles study

J. J. Gong<sup>1</sup>, A. J. Hong<sup>1</sup>, J. Shuai<sup>2</sup>, L. Li<sup>1</sup>, Z. B. Yan<sup>1</sup>, Z. F. Ren<sup>2</sup>, and J. -M. Liu<sup>1</sup>

<sup>1</sup>Laboratory of Solid State Microstructure and Innovation Center of Advanced  
Microstructures, Nanjing University, Nanjing 210093, China

<sup>2</sup>Department of Physics and TeSUH, University of Houston, Houston, TX 77204, USA

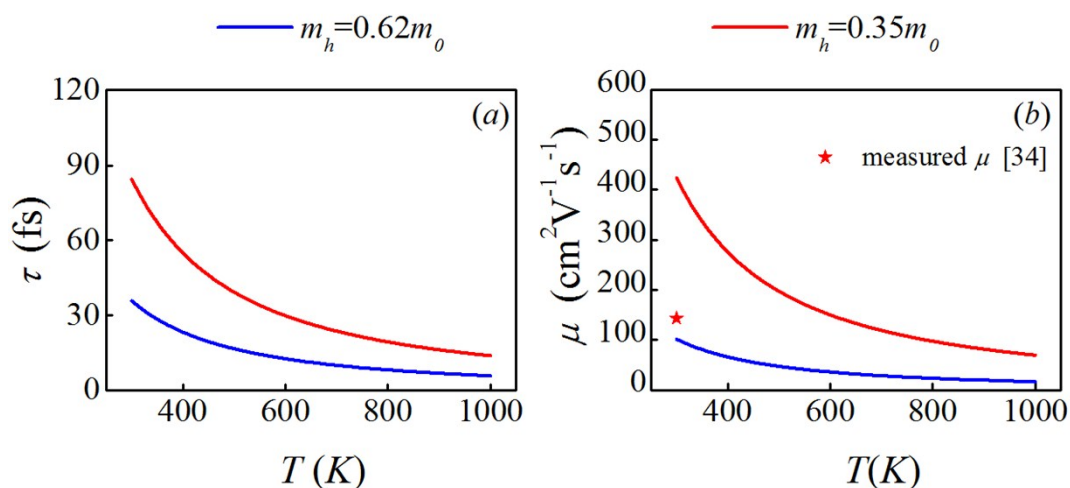

**Figure S1.** The calculated relaxation time  $\tau$  (a), mobility  $\mu$  (b) for the hole-type carrier. The red and blue lines respectively represent the calculated data using the effective mass  $m_h=0.35m_0$ , and  $m_h=0.62m_0$ , here  $m_0$  is the electron mass. The measured mobility at room temperature is marked with a red star.

In this work, the relaxation time  $\tau$  is calculated using the effective mass approximation based on the DP theory. The effective mass  $m_h = 0.35m_0$  is obtained from the electronic structure data, which is lower than the experimentally estimated effective mass of  $0.62m_0$ . At 300K, the measured mobility  $\mu$  is  $\sim 143\text{cm}^2\text{V}^{-1}\text{s}^{-1}$  as reported in Ref. [34]. The calculated mobility value is  $\sim 420\text{cm}^2\text{V}^{-1}\text{s}^{-1}$ . The difference comes from the fact that we only take into account of the acoustic phonon scattering, where experimentally more scattering sources exist,

including grain boundaries, lattice defects, and impurities etc. In order to better analyze the bipolar effect in  $\text{CaMg}_2\text{Bi}_2$ , we take  $m_h=0.62m_0$  in the present calculations.
